# Supplementary material for: Hepatic Venous Pressure Gradient Predicts Further Decompensation in Cirrhosis Patients with Acute Esophageal Variceal Bleeding
Source: MDPI journal article supplement (doi:10.3390/diagnostics13142385), 2023-07-16
Supplement: s1 [file s1]

# Supplementary Materials: Hepatic Venous Pressure Gradient Predicts Further Decompensation in Cirrhosis Patients with Acute Esophageal Variceal Bleeding

Manas Vaishnav <sup>1</sup>, Sagnik Biswas <sup>1</sup>, Abhinav Anand <sup>1</sup>, Piyush Pathak <sup>1</sup>, Shekhar Swaroop <sup>1</sup>, Arnav Aggarwal <sup>1</sup>, Umang Arora <sup>1</sup>, Anshuman Elhence <sup>1</sup>, Shivanand Gamanagatti <sup>2</sup>, Amit Goel <sup>3</sup>, Ramesh Kumar <sup>4</sup> and Shalimar <sup>1,\*</sup>

## Supplementary text

### Method of Hepatic venous pressure gradient assessment

HVPG was measured on the day of the AVB within 8 hours of endotherapy [36] Under strict aseptic precautions and non-invasive vital monitoring (pulse oximetry, electrocardiography, and blood pressure), access to the right internal jugular vein was achieved under direct ultrasonographic guidance using Seldinger's technique after application of a local anesthetic agent (2% Lignocaine). An 18 G needle was used to puncture the internal jugular vein. A guidewire was passed through the needle, and a 7 Fr arterial sheath was inserted over the guide wire. A Swan Ganz catheter (Edward Life Sciences USA) was passed under fluoroscopic guidance through the sheath into the right atrium and inferior vena cava and advanced into any one of the three hepatic veins (right, middle or left). The position was confirmed using a radio-opaque contrast injection after inflating the balloon of the catheter with 1.5 mL of air. A sinusoidogram was carried out to note the presence of any intrahepatic venovenous collaterals. FHVP was measured by keeping the tip of the catheter in the hepatic vein approximately 2-4 cm away from the opening of the vena cava. WHVP was measured after inflating the balloon with 1.5 ml of air and occluding the hepatic vein. The position (i.e., wedge) was confirmed by injecting 5 mL of contrast under fluoroscopy. All measurements were repeated, and a variance of up to 1 mm of Hg was considered acceptable for each pressure reading. At least three consistent paired values (FHVP and WHVP) were taken for each patient.

### Overall decompensation after AVB in the entire AVB cohorts

After the initial presentation with AVB, 62 (42.8%) patients developed further decompensation, with new-onset/worsening ascites being the most common decompensating event in 38 (26.2%) patients, followed by GI bleeding in 36 (24.8%) patients. Details of overall further decompensation and comparison of the esophageal and gastric AVB cohort, as well as predictors of further decompensation, are shown in Supplementary Tables S6–S9 and Supplementary Figure S6.

### Further decompensation based on time of clinical presentation

Data based on time of clinical presentation were analyzed, categorizing all decompensations within 42-days of the first presentation to be related to the index variceal bleeding, and those developing after 42-days of index presentation as further decompensation.

### Decompensation within 42 days of AVB

#### *Whole AVB cohort*

Twenty-six (17.9%) patients decompensated after a median duration of 13 (2-25) days. New-onset/ worsening ascites was the most common decompensating event in 19 (13.1%) patients, followed by GI bleeding, which occurred in 10 (6.9%).(Supplementary Table S10).

#### *Comparison of decompensation within 42 days in esophageal and gastric AVB cohort*

In the esophageal and gastric AVB groups, a total of 19 (18.4%) and 7 (16.7%) patients decompensated within 42 days. The most common decompensations in the two groups were new-onset/worsening ascites in 13 (12.6%) and GI bleeding in 7 (16.7%), respectively. The details of other decompensating events are shown in Supplementary Table S10. On the multivariate model, predictors of decompensation within 42 days of AVB in the esophageal group included CTP score, serum albumin, and blood urea (Supplementary Table S11). In the gastric AVB group, there were no independent predictors of decompensation (Supplementary Table S12).

## References

36. Bochnakova T. Hepatic Venous Pressure Gradient. *Clin Liver Dis.* 2021;17(3):144-148. doi:10.1002/cld.1031

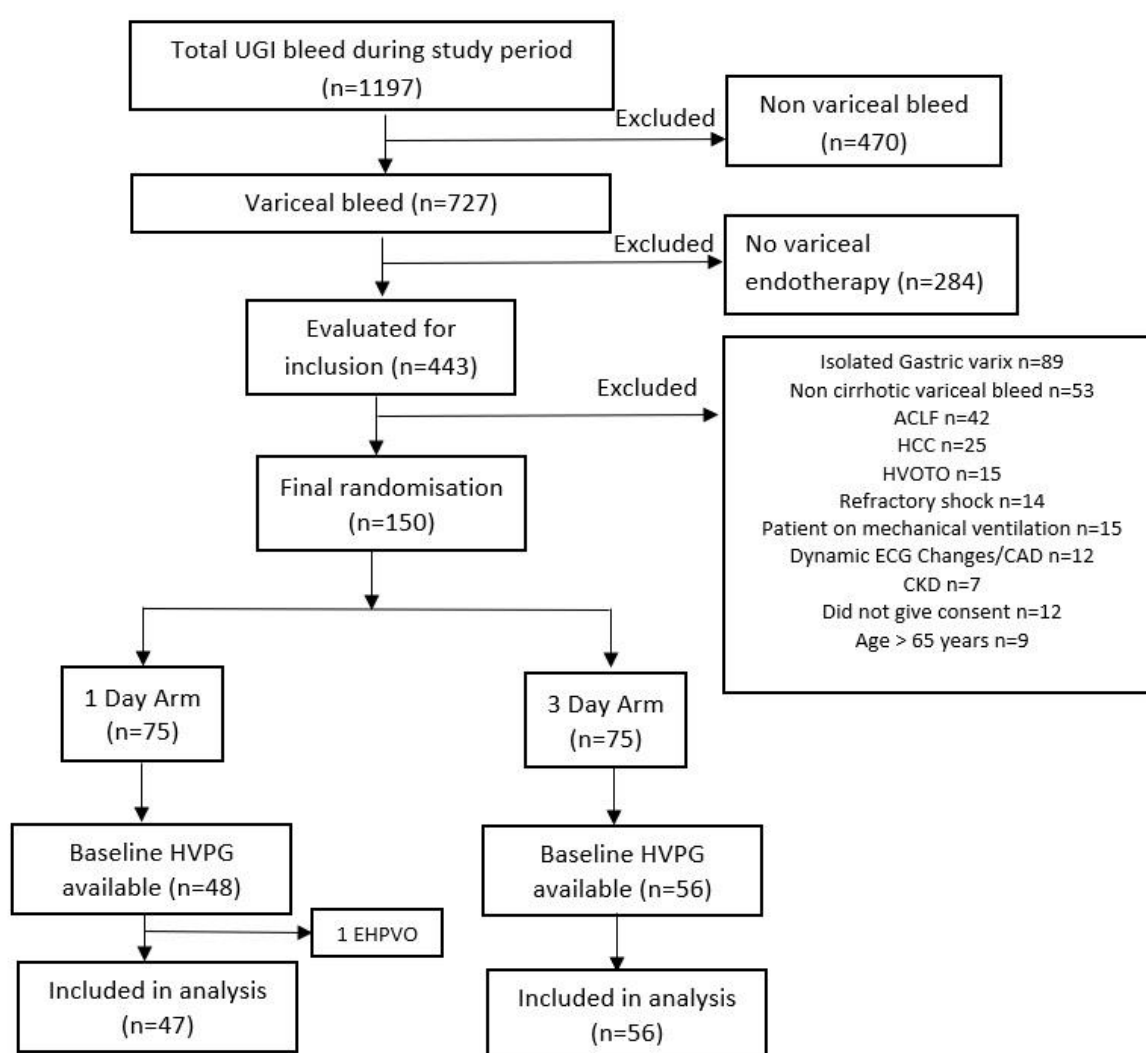

**Figure S1.** Consort chart for esophageal AVB (Study 1).

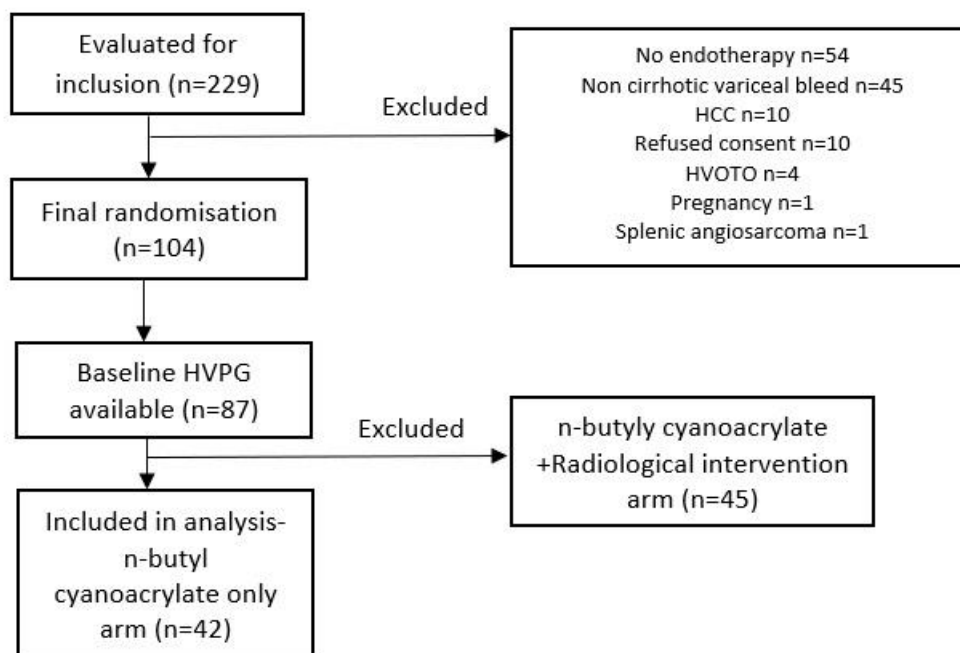

**Figure S2.** Consort chart for gastric AVB (Study 2).

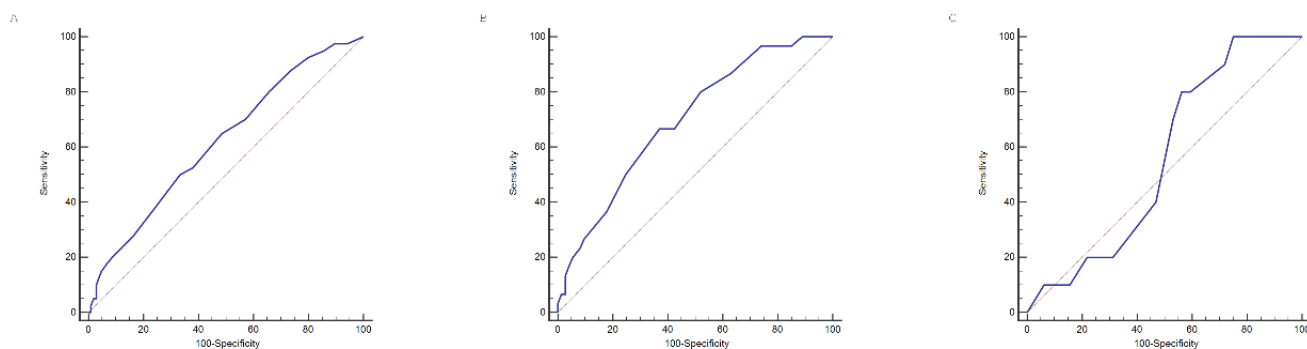

**Figure S3.** HVPg as a predictor of further decompensation (beyond 42 days of acute variceal bleeding), (a) whole cohort, AUROC, 0.619 (0.535-0.699), (b) esophageal acute variceal bleeding, AUROC, 0.698 (0.599-0.784), (c) gastric variceal bleeding, 0.556 (0.395-0.709).

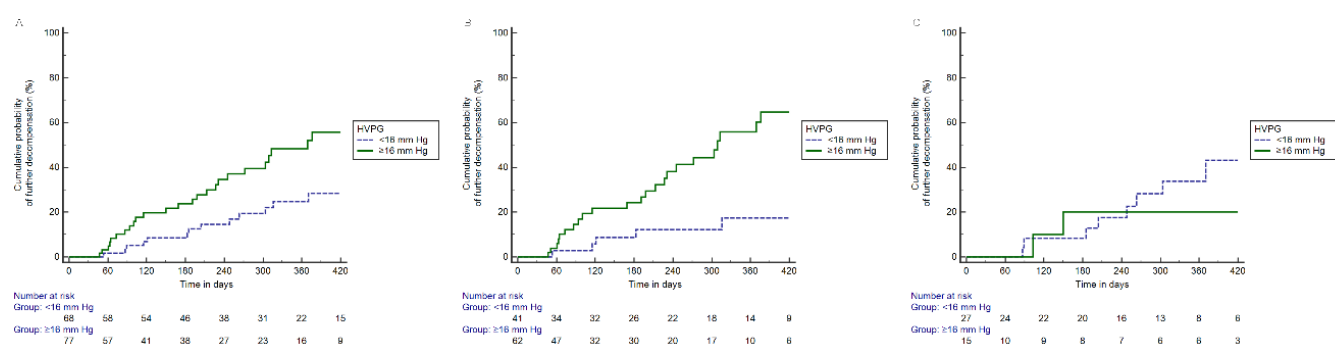

**Figure S4.** HVPG as a predictor of further decompensation (beyond 42 days of acute variceal bleeding), (a) whole cohort, AUROC, 0.619 (0.535–0.699), (b) esophageal acute variceal bleeding, AUROC, 0.698 (0.599–0.784), (c) gastric variceal bleeding, 0.556 (0.395–0.709). Comparing cumulative probability of further decompensation (after 42 days) in patients having HVPG <16 mm Hg and HVPG  $\geq$  16 mm Hg (a) whole cohort (log rank  $P = 0.012$ ), (b) Esophageal AVB (log rank  $P = 0.002$ ), (c) Gastric AVB (log rank  $P = 0.451$ )

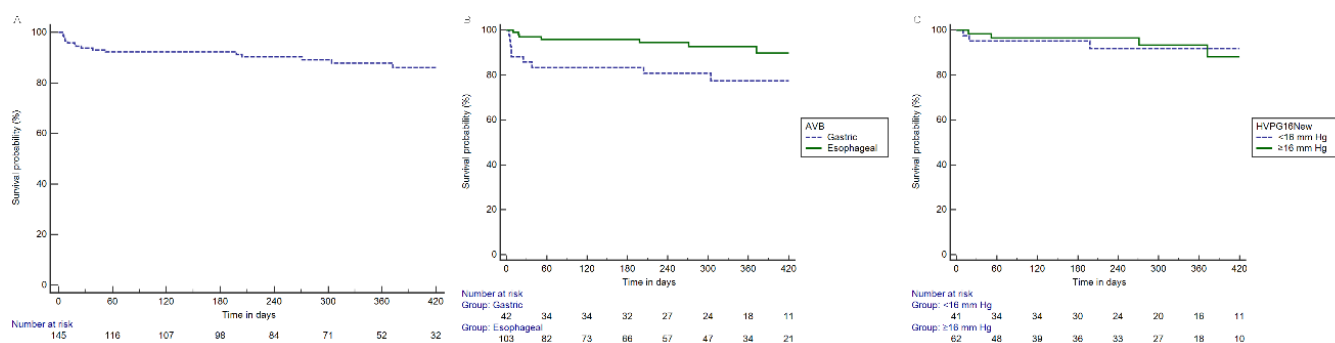

**Figure S5.** Kaplan Meier curve showing cumulative probability of survival in (a) whole cohort, (b) comparing esophageal and gastric AVB group (log rank  $P = 0.039$ ), (c) comparing HVPG < 16 mm Hg and  $\geq$  16 mm Hg in esophageal AVB group (log rank  $P = 0.682$ ).

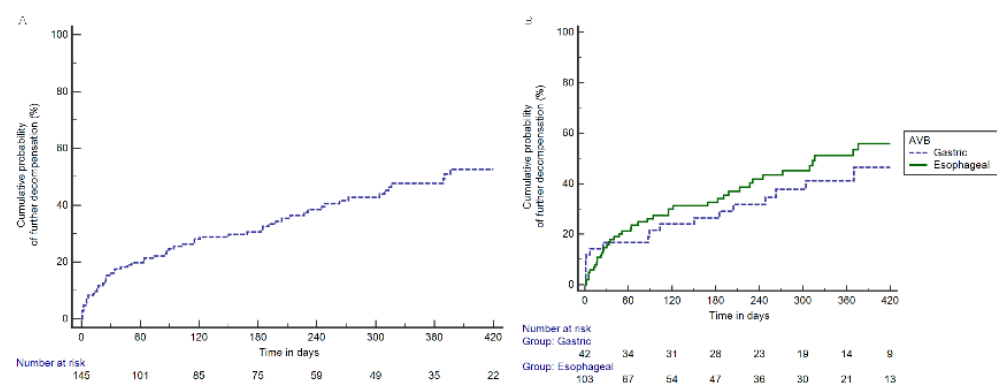

**Figure S6.** Cumulative probability of further decompensation (at any time) in (a) whole cohort and (b) comparison of esophageal and gastric AVB group (log rank  $P = 0.415$ ).

**Table S1.** Univariate and multivariate predictors of further decompensation (>42 days) in gastric AVB.

| Parameters                | Univariate Model     |       | Multivariate Model-1 |       | Multivariate Model-2<br>(Includes CTP score) |       |
|---------------------------|----------------------|-------|----------------------|-------|----------------------------------------------|-------|
|                           | HR                   | P     | HR                   | P     | HR                                           | P     |
| Age                       | 0.998 (0.951-1.048)  | 0.949 |                      |       |                                              |       |
| Sex (Female)              | 0.239 (0.030-1.910)  | 0.177 |                      |       |                                              |       |
| Hemoglobin (g/dL)         | 1.073 (0.877-1.313)  | 0.492 |                      |       |                                              |       |
| Platelets<br>(x103/cu.mm) | 1.004 (1.000-1.007)  | 0.040 | 1.005 (1.001-1.009)  | 0.016 | 1.001 (0.997-1.004)                          | 0.777 |
| Creatinine (mg/dl)        | 1.664 (0.444-6.238)  | 0.450 |                      |       |                                              |       |
| INR                       | 1.500 (0.521-4.319)  | 0.452 |                      |       |                                              |       |
| Bilirubin (mg/dl)         | 1.559 (1.125-2.161)  | 0.008 | 2.071 (1.080-3.971)  | 0.028 |                                              |       |
| Albumin (g/dL)            | 0.716 (0.298-1.721)  | 0.456 |                      |       |                                              |       |
| Sodium (meq/L)            | 0.861 (0.752-0.986)  | 0.031 | 0.880 (0.766-1.012)  | 0.073 | 0.830 (0.709-0.973)                          | 0.022 |
| CTP Score                 | 1.614 (1.156-2.254)  | 0.005 |                      |       | 1.667 (1.121-2.480)                          | 0.012 |
| MELD score                | 1.089 (0.980-1.210)  | 0.112 |                      |       |                                              |       |
| Ascites, yes              | 3.620 (0.935-14.019) | 0.063 | 2.049 (0.430-9.775)  | 0.368 |                                              |       |
| Diabetes, yes             | 0.952 (0.202-4.494)  | 0.951 |                      |       |                                              |       |
| HVPG mmHg                 | 0.945 (0.818-1.092)  | 0.445 |                      |       |                                              |       |

Note: Multivariate model-1, all significant variables included; Multivariate model-2, includes CTP score (excludes INR, bilirubin, albumin and ascites). Abbreviations: AVB, Acute variceal bleeding; CTP, Child Turcotte Pugh; HVPG, Hepatic venous pressure gradient; INR, International normalised ratio; MELD, Model for end-stage liver disease

**Table S2.** Overall mortality and causes of death.

| Parameters                   | Overall cohort (n=145)<br>(%) | Esophageal AVB<br>(n=103) | Gastric<br>AVB<br>(n=45) | P-<br>value |
|------------------------------|-------------------------------|---------------------------|--------------------------|-------------|
| Death                        | 17 (11.7%)                    | 8 (7.8%)                  | 9 (20%)                  | 0.020       |
| GI bleed                     | 13 (76.5%)                    | 6 (75%)                   | 7 (77.8%)                |             |
| Progressive liver<br>failure | 4 (23.5%)                     | 2 (25%)                   | 2 (22.2%)                |             |

**Table S3.** Univariate and multivariate predictors of death in whole cohort of esophageal and gastric AVB.

| Univariate Model                    |                       |        | Multivariate Model-1<br>(All significant continuous variable) |       | Multivariate Model-2 (Includes MELD) |       | Multivariate Model-3<br>(Includes CTP score) |       |
|-------------------------------------|-----------------------|--------|---------------------------------------------------------------|-------|--------------------------------------|-------|----------------------------------------------|-------|
| Parameters                          | HR                    | P      | HR                                                            | P     | HR                                   | P     | HR                                           | P     |
| Age (years)                         | 1.072 (0.992-1.020)   | 0.006  | 1.087 (1.026-1.151)                                           | 0.004 | 1.089 (1.034-1.148)                  | 0.001 | 1.076 (1.023-1.132)                          | 0.005 |
| Sex (Female)                        | 0.414 (0.055-3.125)   | 0.393  |                                                               |       |                                      |       |                                              |       |
| Hemoglobin (g/dL)                   | 0.952 (0.792-1.146)   | 0.606  |                                                               |       |                                      |       |                                              |       |
| Platelets (x10 <sup>3</sup> /cu.mm) | 0.999 (0.992-1.006)   | 0.828  |                                                               |       |                                      |       |                                              |       |
| Urea (mg/dL)                        | 1.010 (0.999-1.021)   | 0.088  |                                                               |       |                                      |       |                                              |       |
| Creatinine (mg/dL)                  | 3.981 (1.357-11.674)  | 0.012  | 1.908 (0.553-6.578)                                           | 0.419 |                                      |       | 2.361 (0.727-7.666)                          | 0.153 |
| INR                                 | 2.181 (1.041-4.569)   | 0.039  | 2.346 (0.941-5.849)                                           | 0.067 |                                      |       |                                              |       |
| Total bilirubin (mg/dL)             | 1.160 (1.009-1.333)   | 0.037  | 1.070 (0.903-1.269)                                           | 0.433 |                                      |       |                                              |       |
| Albumin (g/dL)                      | 0.637 (0.292-1.390)   | 0.257  |                                                               |       |                                      |       |                                              |       |
| Sodium (mEq/L)                      | 0.912 (0.824-1.009)   | 0.074  | 0.983 (0.883-1.094)                                           | 0.757 |                                      |       | 0.948 (0.858-1.046)                          | 0.287 |
| CTP Score                           | 1.414 (1.073-1.862)   | 0.014  |                                                               |       |                                      |       | 1.466 (1.092-1.967)                          | 0.011 |
| MELD score                          | 1.143 (1.067-1.226)   | <0.001 |                                                               |       | 1.157 (1.062-1.260)                  | 0.001 |                                              |       |
| Ascites, yes                        | 10.002 (2.281-43.858) | 0.002  | 6.822 (1.453-32.030)                                          | 0.015 | 6.521 (1.406-30.247)                 | 0.017 |                                              |       |
| Diabetes, yes                       | 0.566 (0.129-2.480)   | 0.450  |                                                               |       |                                      |       |                                              |       |
| HVPG (mmHg)                         | 1.019 (0.928-1.119)   | 0.692  |                                                               |       |                                      |       |                                              |       |

---

Note: Multivariate model-1, all significant variables included; multivariate model-2, includes MELD score (excludes creatinine, INR, bilirubin); Multivariate model-3, includes CTP score (excludes INR, bilirubin, albumin, ascites). Abbreviations: AVB, Acute variceal bleeding; CTP, Child Turcotte Pugh; HVPG, Hepatic venous pressure gradient; INR, International normalised ratio; MELD, Model for end-stage liver disease



**Table S4.** Comparison of of further decompensation (after  $\geq 43$  days) in patients with esophageal AVB receiving-1-day vs 3 days terlipressin.

| Parameters                 | 1 day terlipressin (n=47) | 3 days terlipressin (n=56) | P value |
|----------------------------|---------------------------|----------------------------|---------|
| Any further decompensation | 16 (34%)                  | 14 (25%)                   | 0.314   |
| Ascites                    | 4 (8.5%)                  | 12 (21.4 %)                | 0.071   |
| GI bleed                   | 12 (25.5%)                | 6 (10.7 %)                 | 0.068   |
| HE                         | 0                         | 5 (8.9 %)                  | 0.061   |
| Jaundice                   | 3 (6.4%)                  | 2 (3.6%)                   | 0.658   |
| Death                      | 2 (4.3%)                  | 3 (5.4%)                   | 1.000   |

**Table S5.** Comparison of further decompensation (after  $\geq 43$  days) in patients of gastric AVB- with and without radiological intervention.

| Parameters                 | Gastric AVB-Without intervention (n=42) | Gastric AVB- With intervention (n=45) | P value |
|----------------------------|-----------------------------------------|---------------------------------------|---------|
| Any further decompensation | 10 (23.8%)                              | 13 (28.9%)                            | 0.591   |
| Ascites                    | 4 (9.5%)                                | 10 (22.2%)                            | 0.107   |
| GI bleed                   | 9 (21.4%)                               | 3 (6.7%)                              | 0.046   |
| HE                         | 1 (2.4%)                                | 7 (15.6%)                             | 0.034   |
| Jaundice                   | 2 (4.8%)                                | 3 (6.7%)                              | 0.703   |
| Death                      | 2 (4.8%)                                | 5 (11.1%)                             | 0.277   |

**Table S6.** Any further decompensation at follow-up in the overall cohort, esophageal, and gastric AVB cohorts.

| Parameters                     | Overall cohort<br>(n=145) | Esophageal AVB<br>(n=103) | Esophageal AVB HVPG<br><16 mm Hg<br>(n=41) | Esophageal AVB HVPG<br>≥16 mm Hg<br>(n=62) | P<br>value* | Gastric AVB<br>(n=42) | P value** |
|--------------------------------|---------------------------|---------------------------|--------------------------------------------|--------------------------------------------|-------------|-----------------------|-----------|
| Any further decompensation     | 62 (42.8%)                | 45 (43.7%)                | 11 (26.8%)                                 | 34 (54.8%)                                 | 0.005       | 17 (40.5%)            | 0.723     |
| Median duration(days)          | 79 (17-216)               | 64 (19-220)               | 33 (14-183)                                | 68 (23-228)                                | 0.561       | 89 (2-226)            | 0.533     |
| Type of further decompensation |                           |                           |                                            |                                            |             |                       |           |
| Ascites (new or worsening)     | 38 (26.2%)                | 28 (27.2%)                | 6 (14.6%)                                  | 22 (35.5%)                                 | 0.020       | 10 (23.8%)            | 0.675     |
| GI Bleed                       | 36 (24.8%)                | 20 (19.4%)                | 3 (7.3%)                                   | 17 (27.4%)                                 | 0.012       | 16 (38.1%)            | 0.018     |
| HE                             | 13 (9%)                   | 8 (7.8%)                  | 3 (7.3%)                                   | 5 (8.1%)                                   | 0.890       | 5 (11.9%)             | 0.523     |
| Jaundice                       | 9 (6.2%)                  | 5 (4.9%)                  | 2 (4.9%)                                   | 3 (4.8%)                                   | 0.993       | 4 (9.5%)              | 0.283     |
| Death                          | 17 (11.7%)                | 8 (7.8%)                  | 3 (7.3%)                                   | 5 (8.1%)                                   | 0.890       | 9 (21.4%)             | 0.042     |

Abbreviations: AVB, Acute variceal bleeding; GI, Gastrointestinal; HE, Hepatic encephalopathy. Note: \*comparison between Esophageal AVB < 16 mm Hg and ≥16 mmHg; \*\*comparison between Esophageal AVB and Gastric AVB

**Table S7.** Univariate and multivariate predictors of further decompensation anytime in whole cohort (esophageal and gastric AVB).

| Univariate Model                    |                        |        | Multivariate Model-1<br>(All significant continuous variable) |        | Multivariate Model-2<br>(Includes MELD) |        | Multivariate Model-3 (Includes CTP score) |        |
|-------------------------------------|------------------------|--------|---------------------------------------------------------------|--------|-----------------------------------------|--------|-------------------------------------------|--------|
| Parameters                          | HR                     | P      | HR                                                            | P      | HR                                      | P      | HR                                        | P      |
| Age (years)                         | 1.005<br>(0.982-1.030) | 0.653  |                                                               |        |                                         |        |                                           |        |
| Sex (Female)                        | 0.819<br>(0.372-1.804) | 0.620  |                                                               |        |                                         |        |                                           |        |
| Hemoglobin (g/dL)                   | 0.930<br>(0.843-1.025) | 0.144  |                                                               |        |                                         |        |                                           |        |
| Platelets (×10 <sup>3</sup> /cu.mm) | 1.001<br>(0.998-1.004) | 0.537  |                                                               |        |                                         |        |                                           |        |
| Urea (mg/dL)                        | 1.007<br>(1.001-1.013) | 0.032  |                                                               |        |                                         |        |                                           |        |
| Creatinine (mg/dL)                  | 1.942<br>(1.042-3.617) | 0.037  | 1.186<br>(0.597-2.354)                                        | 0.626  |                                         |        | 1.385<br>(0.728-2.636)                    | 0.322  |
| INR                                 | 2.196<br>(1.483-3.252) | <0.001 | 1.83<br>(0.748-1.870)                                         | 0.472  |                                         |        |                                           |        |
| Total bilirubin (mg/dL)             | 1.249 (1.154-1.352)    | <0.001 | 1.193<br>(1.085-1.312)                                        | <0.001 |                                         |        |                                           |        |
| Albumin (g/dL)                      | 0.380<br>(0.238-0.609) | <0.001 | 0.585<br>(0.344-0.995)                                        | 0.048  | 0.551<br>(0.328-0.925)                  | 0.024  |                                           |        |
| Sodium (mEq/L)                      | 0.917<br>(0.866-0.971) | 0.003  | 0.959<br>(0.904-1.018)                                        | 0.167  |                                         |        | 0.941<br>(0.888-0.998)                    | 0.044  |
| CTP Score                           | 1.616<br>(1.392-1.876) | <0.001 |                                                               |        |                                         |        | 1.568<br>(1.342-1.832)                    | <0.001 |
| MELD score                          | 1.124<br>(1.081-1.171) | <0.001 |                                                               |        | 1.089<br>(1.042-1.138)                  | <0.001 |                                           |        |
| Ascites, yes                        | 2.364<br>(1.410-3.964) | <0.001 | 1.477<br>(0.826-2.641)                                        | 0.189  | 1.377<br>(0.783-2.419)                  | 0.266  |                                           |        |
| Diabetes, yes                       | 0.889<br>(0.462-1.712) | 0.725  |                                                               |        |                                         |        |                                           |        |
| HVPG (mmHg)                         | 1.050<br>(1.005-1.097) | 0.029  | 1.048<br>(0.997-1.102)                                        | 0.066  | 1.030<br>(0.980-1.084)                  | 0.246  | 1.061 (0.994-1.133)                       | 0.075  |

Note: Multivariate model-1, all significant variables included(except creatinine); multivariate model-2, includes MELD score (excludes urea,creatinine, bilirubin, INR and sodium); multivariate model-3, includes CTP score (excludes INR,bilirubin.albumin and ascites). Abbreviations: AVB,Acute variceal bleeding; CTP,Child Turcotte Pugh; HVPG, Hepatic venous pressure gradient; INR, International normalised ratio; MELD, Model for end-stage liver disease

**Table S8.** Univariate and multivariate predictors of further decompensation at any time in esophageal AVB.

| Univariate Model                    |                        |        | Multivariate Model-1<br>(All significant continuous variable) |        | Multivariate Model-2<br>(Includes MELD) |       | Multivariate Model-3 (Includes CTP score) |        |
|-------------------------------------|------------------------|--------|---------------------------------------------------------------|--------|-----------------------------------------|-------|-------------------------------------------|--------|
| Parameters                          | HR                     | P      | HR                                                            | P      | HR                                      | P     | HR                                        | P      |
| Age (years)                         | 0.999<br>(0.967-1.032) | 0.972  |                                                               |        |                                         |       |                                           |        |
| Sex (Female)                        | 2.182<br>(0.918-5.281) | 0.070  | 2.674<br>(1.036-6.900)                                        | 0.042  | 2.291 (0.896-5.854)                     | 0.083 | 2.191<br>(0.877-5.478)                    | 0.093  |
| Hemoglobin (g/dL)                   | 0.889<br>(0.781-1.012) | 0.076  | 0.934<br>(0.758-1.151)                                        | 0.520  | 1.009 (0.844-1.207)                     | 0.922 | 0.966<br>(0.819-1.140)                    | 0.685  |
| Platelets (×10 <sup>3</sup> /cu.mm) | 0.999<br>(0.993-1.004) | 0.629  |                                                               |        |                                         |       |                                           |        |
| Urea (mg/dL)                        | 1.010<br>(1.002-1.018) | 0.015  | 1.010<br>(1.001-1.020)                                        | 0.037  |                                         |       | 1.015<br>(1.005-1.024)                    | 0.003  |
| Creatinine (mg/dL)                  | 1.994<br>(0.862-4.614) | 0.107  |                                                               |        |                                         |       |                                           |        |
| INR                                 | 2.394<br>(1.518-3.776) | <0.001 | 0.826<br>(0.453-1.504)                                        | 0.531  |                                         |       |                                           |        |
| Total bilirubin (mg/dL)             | 1.291<br>(1.155-1.443) | <0.001 | 1.382<br>(1.177-1.622)                                        | <0.001 |                                         |       |                                           |        |
| Albumin (g/dL)                      | 0.235<br>(0.126-0.438) | <0.001 | 0.454<br>(0.193-1.068)                                        | 0.070  | 0.354 (0.156-0.803)                     | 0.013 |                                           |        |
| Sodium (mEq/L)                      | 0.947<br>(0.878-1.022) | 0.162  |                                                               |        |                                         |       |                                           |        |
| CTP Score                           | 1.860<br>(1.517-2.279) | <0.001 |                                                               |        |                                         |       | 1.902<br>(1.533-2.360)                    | <0.001 |

|               |                            |        |                            |       |                         |       |                            |       |
|---------------|----------------------------|--------|----------------------------|-------|-------------------------|-------|----------------------------|-------|
| MELD score    | 1.125<br>(1.074-<br>1.179) | <0.001 |                            |       | 1.089 (1.035-<br>1.145) | 0.001 |                            |       |
| Ascites, yes  | 2.109<br>(1.155-<br>3.850) | 0.015  | 1.414<br>(0.721-<br>2.775) | 0.314 | 1.154 (0.598-<br>2.226) | 0.669 |                            |       |
| Diabetes, yes | 1.060<br>(0.507-<br>2.217) | 0.877  |                            |       |                         |       |                            |       |
| HVPG (mmHg)   | 1.077<br>(1.019-<br>1.139) | 0.009  | 1.081<br>(1.013-<br>1.153) | 0.019 | 1.051 (0.984-<br>1.122) | 0.140 | 1.073<br>(1.005-<br>1.145) | 0.034 |

Note: Multivariate model-1, all significant variables included; Multivariate model-2, includes MELD score (excludes urea, INR and bilirubin); Multivariate model-3, includes CTP score (excludes INR, bilirubin, albumin and ascites). Abbreviations: AVB, Acute variceal bleeding; CTP, Child Turcotte Pugh; HVPG, Hepatic venous pressure gradient; INR, International normalised ratio; MELD, Model for end-stage liver disease.

**Table S9.** Univariate and multivariate predictors of further decompensation at anytime in patients with gastric AVB.

| Parameters                          | Univariate Model       |       | Multivariate Model (All significant continuous variable) |       | Multivariate Model (Includes MELD) |       | Multivariate Model (Includes CTP score) |       |
|-------------------------------------|------------------------|-------|----------------------------------------------------------|-------|------------------------------------|-------|-----------------------------------------|-------|
|                                     | HR                     | P     | HR                                                       | P     | HR                                 | P     | HR                                      | P     |
| Age (Years)                         | 1.019<br>(0.980-1.060) | 0.345 |                                                          |       |                                    |       |                                         |       |
| Sex (Female)                        | 0.166<br>(0.022-1.265) | 0.083 | 0.271<br>(0.033-2.222)                                   | 0.224 | 1.092<br>(0.991-1.203)             | 0.075 | 0.274<br>(0.034-2.222)                  | 0.225 |
| Hemoglobin (g/dL)                   | 1.014<br>(0.862-1.192) | 0.866 |                                                          |       |                                    |       |                                         |       |
| Platelets (x10 <sup>3</sup> /cu.mm) | 1.002<br>(0.999-1.005) | 0.187 |                                                          |       |                                    |       |                                         |       |
| Urea (mg/dl)                        | 1.005<br>(0.994-1.016) | 0.356 |                                                          |       |                                    |       |                                         |       |
| Creatinine (mg/dL)                  | 2.169<br>(0.802-5.868) | 0.127 |                                                          |       |                                    |       |                                         |       |
| INR                                 | 1.889<br>(0.911-3.914) | 0.087 | 01.333<br>(0.577-3.078)                                  | 0.500 |                                    |       |                                         |       |
| Total bilirubin (mg/dL)             | 1.245<br>(1.090-1.422) | 0.001 | 1.162<br>(1.005-1.343)                                   | 0.042 |                                    |       |                                         |       |
| Albumin (g/dL)                      | 0.750<br>(0.387-1.453) | 0.394 |                                                          |       |                                    |       |                                         |       |
| Sodium (mEq/L)                      | 0.860<br>(0.775-0.954) | 0.004 | 0.895<br>(0.800-1.002)                                   | 0.053 |                                    |       | 0.856<br>(0.766-0.956)                  | 0.006 |
| CTP Score                           | 1.418<br>(1.090-1.846) | 0.009 |                                                          |       |                                    |       | 1.384<br>(1.054-1.816)                  | 0.019 |
| MELD score                          | 1.141<br>(1.050-1.239) | 0.002 |                                                          |       | 1.092<br>(0.991-1.203)             | 0.075 |                                         |       |
| Ascites, yes                        | 3.328<br>(1.169-9.473) | 0.024 | 1.588<br>(0.493-5.118)                                   | 0.439 | 1.609<br>(0.467-5.545)             | 0.451 |                                         |       |
| Diabetes, yes                       | 0.550<br>(0.125-2.408) | 0.427 |                                                          |       |                                    |       |                                         |       |
| HVPG (mmHg)                         | 0.995<br>(0.907-1.091) | 0.912 |                                                          |       |                                    |       |                                         |       |

Note: Multivariate model-1, all significant variables included; multivariate model-2, includes MELD score (excludes INR, bilirubin); multivariate model-3, includes CTP score (excludes INR, bilirubin, albumin, ascites). Abbreviations: AVB, Acute variceal bleeding; CTP, Child Turcotte Pugh; HVPG, Hepatic venous pressure gradient; INR, International normalised ratio; MELD, Model for end-stage liver disease.

**Table S10.** Further decompensation within 42 days in the overall cohort, esophageal, and gastric AVB cohorts.

| Parameters                      | Overall cohort<br>(n=145) | Esophageal AVB<br>(n=103) | Esophageal AVB<br>HVPG <16 mm Hg<br>(n=41) | Esophageal AVB HVPG<br>≥16 mm Hg<br>(n=62) | P<br>value* | Gastric AVB<br>(n=45) | P<br>value** |
|---------------------------------|---------------------------|---------------------------|--------------------------------------------|--------------------------------------------|-------------|-----------------------|--------------|
| Any further decompensation      | 26 (17.9%)                | 19 (18.4%)                | 6 (14.6%)                                  | 13 (21.0%)                                 | 0.417       | 7(16.7%)              | 0.800        |
| Median duration (Days)          | 13 (2-25)                 | 17 (5-26)                 | 22 (2-40)                                  | 16 (5-26)                                  | 0.895       | 1 (1-7)               | 0.007        |
| Types of further decompensation |                           |                           |                                            |                                            |             |                       |              |
| New onset Ascites/Worsening     | 19 (13.1%)                | 13 (12.6%)                | 4 (9.8%)                                   | 9 (14.5%)                                  | 0.476       | 6 (14.3%)             | 0.788        |
| GI Bleed                        | 10 (6.9%)                 | 3 (2.9%)                  | 0                                          | 3 (4.8%)                                   | 0.274       | 7 (16.7%)             | 0.007        |
| HE                              | 8 (5.5%)                  | 4 (3.9%)                  | 2 (4.9%)                                   | 2 (3.2%)                                   | 1.000       | 4 (9.5%)              | 0.177        |
| Jaundice                        | 2 (1.4%)                  | 0                         | 0                                          | 0                                          | NA          | 2 (4.8%)              | 0.082        |
| Death                           | 10 (6.9%)                 | 3 (2.9%)                  | 2 (4.9%)                                   | 1 (1.6%)                                   | 0.562       | 7 (16.7%)             | 0.007        |

Note: Abbreviations: AVB, Acute variceal bleeding; GI, Gastrointestinal; HE, Hepatic encephalopathy; \*comparison between Esophageal AVB < 16 mm Hg and ≥16 mmHg; \*\*comparison between Esophageal AVB and Gastric AVB.



**Table S11.** Univariate and multivariate predictors of further decompensation within 42 days in patients with esophageal AVB.

| Univariate Model                    |                        |        | Multivariate Model-1 (All significant continuous variable) |       | Multivariate Model-2 (Includes MELD) |       | Multivariate Model-3 (Includes CTP score) |       |
|-------------------------------------|------------------------|--------|------------------------------------------------------------|-------|--------------------------------------|-------|-------------------------------------------|-------|
| Parameters                          | HR                     | P      | HR                                                         | P     | HR                                   | P     | HR                                        | P     |
| Age (years)                         | 1.026<br>(0.973-1.081) | 0.339  |                                                            |       |                                      |       |                                           |       |
| Sex (Female)                        | 2.973<br>(0.985-8.976) | 0.053  | 0.384<br>(.0118-1.245)                                     | 0.111 | 0.464<br>(0.144-1.494)               | 0.198 | 0.459<br>(0.146-1.444)                    | 0.183 |
| Hemoglobin (g/dL)                   | 0.900<br>(0.748-1.083) | 0.266  |                                                            |       |                                      |       |                                           |       |
| Platelets (x10 <sup>3</sup> /cu.mm) | 0.998<br>(0.988-1.007) | 0.620  |                                                            |       |                                      |       |                                           |       |
| Urea (mg/dL)                        | 1.019<br>(1.008-1.029) | 0.001  | 1.018<br>(1.006-1.031)                                     | 0.005 |                                      |       | 1.018<br>(1.006-1.030)                    | 0.003 |
| Creatinine (mg/dL)                  | 1.024<br>(0.280-3.753) | 0.971  |                                                            |       |                                      |       |                                           |       |
| INR                                 | 1.725<br>(0.854-3.485) | 0.129  |                                                            |       |                                      |       |                                           |       |
| Total bilirubin (mg/dL)             | 1.258<br>(1.107-1.430) | <0.001 | 1.232<br>(1.066-1.424)                                     | 0.005 |                                      |       |                                           |       |
| Albumin (g/dL)                      | 0.193<br>(0.071-0.521) | 0.001  | 0.479<br>(0.146-1.567)                                     | 0.224 | 0.272<br>(0.091-0.814)               | 0.020 |                                           |       |
| Sodium (mEq/L)                      | 0.925<br>(0.846-1.012) | 0.088  | 0.960<br>(0.861-1.071)                                     | 0.465 |                                      |       |                                           |       |
| CTP Score                           | 1.728<br>(1.318-2.266) | <0.001 |                                                            |       |                                      |       | 1.613<br>(1.215-2.142)                    | 0.001 |
| MELD score                          | 1.085<br>(1.015-1.160) | <0.016 |                                                            |       | 1.044<br>(0.974-1.119)               | 0.224 |                                           |       |
| Ascites, yes                        | 2.198<br>(0.865-5.589) | 0.098  | 1.393<br>(0.507-3.832)                                     | 0.520 | 1.216<br>(0.444-3.334)               | 0.703 |                                           |       |
| Diabetes, yes                       | 1.160<br>(0.385-3.495) | 0.792  |                                                            |       |                                      |       |                                           |       |
| HVPG (mmHg)                         | 0.971<br>(0.880-1.073) | 0.566  |                                                            |       |                                      |       |                                           |       |

Note: Multivariate model-1, all significant variables included; multivariate model-2, includes MELD score(excludes INR,bilirubin and urea); multivariate model-3, includes CTP score(excludes bilirubin,albumin,ascites). Abbreviations: AVB,Acute variceal bleeding; CTP,Child Turcotte Pugh; HVPG, Hepatic venous pressure gradient; INR, International normalised ratio; MELD, Model for end-stage liver disease.

**Table S12.** Univariate and multivariate predictors of further decompensation within 42 days in patients with gastric AVB.

| Parameters                          | Univariate Model      |       | Multivariate Model (All significant variable) |       |
|-------------------------------------|-----------------------|-------|-----------------------------------------------|-------|
|                                     | HR                    | P     | HR                                            | P     |
| Age (years)                         | 1.059 (0.984-1.139)   | 0.127 |                                               |       |
| Sex (Female)                        | 0.035 (0.000-98.503)  | 0.408 |                                               |       |
| Hemoglobin (g/dL)                   | 0.914 (0.688-1.215)   | 0.537 |                                               |       |
| Platelets (x10 <sup>3</sup> /cu.mm) | 0.999 (0.992-1.007)   | 0.858 |                                               |       |
| Urea (mg/dL)                        | 0.997 (0.978-1.016)   | 0.754 |                                               |       |
| Creatinine (mg/dL)                  | 3.184 (0.690-14.697)  | 0.138 |                                               |       |
| INR                                 | 2.460 (0.861-7.031)   | 0.093 | 2.266 (1.11-7.751)                            | 0.136 |
| Total bilirubin (mg/dL)             | 1.163 (0.971-1.393)   | 0.100 |                                               |       |
| Albumin (g/dL)                      | 0.800 (0.292-2.195)   | 0.665 |                                               |       |
| Sodium (mEq/L)                      | 0.859 (0.732-1.008)   | 0.062 | 0.873 (0.743-1.026)                           | 0.087 |
| CTP Score                           | 1.163 (0.750-1.805)   | 0.500 |                                               |       |
| MELD score                          | 1.251 (1.062-1.472)   | 0.007 |                                               |       |
| Ascites, yes                        | 2.923 (0.567-15.081)  | 0.200 |                                               |       |
| Diabetes, yes                       | 0.037 (0.000-164.270) | 0.441 |                                               |       |
| HVPG (mmHg)                         | 1.050 (0.935-1.178)   | 0.413 |                                               |       |

Note: Multivariate model- all significant variables included. Abbreviations: AVB, Acute variceal bleeding; CTP, Child Turcotte Pugh; HVPG, Hepatic venous pressure gradient; INR, International normalised ratio; MELD, Model for end-stage liver disease.
